# Supplementary material for: Formaldehyde-free melamine microcapsules as core/shell delivery systems for encapsulation of volatile active ingredients
Source: Royal Society of Chemistry journal article supplement (doi:10.1039/c7ra01413a), 2017-01-01
Supplement: c7ra01413a1.pdf [file c7ra01413a1.pdf]

## Formaldehyde-Free Melamine Microcapsules as Core/Shell Delivery Systems for Encapsulation of Volatile Active Ingredients

Received 00th January 20xx,  
Accepted 00th January 20xx

G. León, N. Paret, P. Fankhauser, D. Grenno, P. Erni, L. Ouali, and D. L. Berthier<sup>a\*</sup>

DOI: 10.1039/x0xx00000x

www.rsc.org/

### Supporting Information

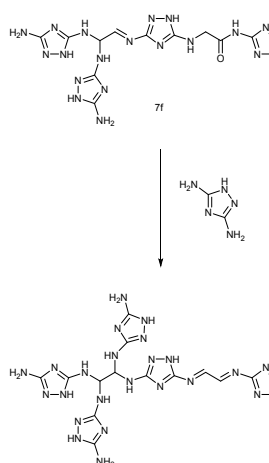

**Figure S1:** Proposed structure of oligomer 7g' from the copolymerization of guanazole and glyoxal according to the LC/ESI-TOF-MS measurements.

| Resin                         | A9            | B9            | C9            | D9            |
|-------------------------------|---------------|---------------|---------------|---------------|
| Interfacial tension<br>(mN/m) | 11.86 +/-0.04 | 12.14 +/-0.21 | 11.83 +/-0.13 | 10.96 +/-0.28 |

**Table S1.** Interfacial tension of aqueous solution of resins A-D at 3 wt% with model perfume measured by pendant drop method

<sup>a</sup> Firmenich SA, Corporate Research Division, 1 Routes des Jeunes, 1211 Genève 8, Switzerland.

Electronic Supplementary Information (ESI) available: [details of any supplementary information available should be included here]. See DOI: 10.1039/x0xx00000x
